# Supplementary material for: Tunable spectra and charge transfer process of benzodifurandione-based polymer by sulfur substitution
Source: Royal Society of Chemistry journal article supplement (doi:10.1039/c4ra16147e), 2015-01-01
Supplement: c4ra16147e1.pdf [file c4ra16147e1.pdf]

## Tunable spectra and charge transfer process of benzodifurandione-based polymer by sulfur substitution

### Supporting materials

**Table S1.** Energy levels of HOMO, LUMO and energy gap  $\Delta_{H-L}$  of the original and the designed tri-polymers (in unit: eV).

|                | B     | Su1   | Su2   | Su3   | Su4   | Su5   | Su6   | Su    |
|----------------|-------|-------|-------|-------|-------|-------|-------|-------|
| H              | -5.44 | -5.39 | -5.38 | -5.37 | -5.29 | -5.28 | -5.26 | -5.16 |
| L              | -3.67 | -4.04 | -3.97 | -3.71 | -4.31 | -4.07 | -4.04 | -4.40 |
| $\Delta_{H-L}$ | 1.77  | 1.35  | 1.41  | 1.66  | 0.98  | 1.21  | 1.22  | 0.76  |

**Table S2.** Percentage composition of several frontier molecular orbitals of BDPPV and designed molecules.

| Subunit | HOMO |    |    | LUMO |    |    |
|---------|------|----|----|------|----|----|
|         | 1    | 2  | 3  | 1    | 2  | 3  |
| B       | 37   | 43 | 20 | 20   | 59 | 21 |
| Su1     | 33   | 33 | 34 | 19   | 49 | 32 |
| Su2     | 36   | 34 | 31 | 20   | 48 | 32 |
| Su3     | 41   | 39 | 20 | 26   | 54 | 20 |
| Su4     | 29   | 29 | 42 | 19   | 39 | 42 |
| Su5     | 35   | 31 | 33 | 23   | 48 | 49 |
| Su6     | 35   | 30 | 35 | 23   | 45 | 32 |
| Su      | 28   | 28 | 44 | 24   | 35 | 42 |

**Table S3.** Calculated absorption peak and oscillator strength for original and designed molecules along with the increasing number of N.

|     | N=1     |          | N=2     |          | N=3     |          | N= $\infty$ |          |
|-----|---------|----------|---------|----------|---------|----------|-------------|----------|
|     | Ab(nm)  | <i>f</i> | Ab(nm)  | <i>f</i> | Ab(nm)  | <i>f</i> | Ab(nm)      | <i>f</i> |
| B   | 511.34  | 1.1381   | 566.75  | 3.3932   | 592.86  | 5.4408   | 630.09      | 6.99403  |
| Su1 | 691.08  | 0.4906   | 737.97  | 1.8770   | 768.85  | 3.1040   | 800.70      | 4.05767  |
| Su2 | 642.22  | 0.4274   | 706.38  | 1.9509   | 736.81  | 3.3903   | 779.93      | 4.44178  |
| Su3 | 552.13  | 0.8904   | 615.24  | 2.8308   | 639.49  | 4.7047   | 681.69      | 6.04548  |
| Su4 | 849.47  | 0.4347   | 941.55  | 1.4708   | 996.01  | 2.3817   | 1058.31     | 3.09418  |
| Su5 | 786.92  | 0.3521   | 844.85  | 1.3298   | 877.93  | 2.2637   | 917.08      | 2.93888  |
| Su6 | 769.92  | 0.2114   | 851.07  | 1.0836   | 879.65  | 2.1670   | 933.81      | 2.77895  |
| Su  | 1027.54 | 0.2760   | 1171.07 | 1.0154   | 1252.37 | 1.7196   | 1349.34     | 2.23013  |

\*Ab and *f* is Absorption peak and oscillator strength, respectively.

**Table S4.** Energy levels (H and L) and energy gaps under the field.

|     | $1 \times 10^{-3}$ |        |                | $2 \times 10^{-3}$ |        |                | $3 \times 10^{-3}$ |        |                |
|-----|--------------------|--------|----------------|--------------------|--------|----------------|--------------------|--------|----------------|
|     | H                  | L      | $\Delta_{H-L}$ | H                  | L      | $\Delta_{H-L}$ | H                  | L      | $\Delta_{H-L}$ |
| B   | -5.456             | -3.325 | 2.131          | -5.335             | -3.359 | 1.976          | -5.195             | -3.405 | 1.790          |
| Su1 | -5.407             | -3.725 | 1.682          | -5.365             | -3.739 | 1.626          | -5.302             | -3.758 | 1.544          |
| Su2 | -5.373             | -3.608 | 1.765          | -5.283             | -3.66  | 1.623          | -5.178             | -3.722 | 1.456          |
| Su3 | -5.441             | -3.365 | 2.076          | -5.383             | -3.404 | 1.979          | -5.284             | -3.456 | 1.828          |
| Su4 | -5.287             | -3.967 | 1.32           | -5.246             | -3.984 | 1.262          | -5.195             | -4.004 | 1.191          |
| Su5 | -5.292             | -3.746 | 1.546          | -5.264             | -3.759 | 1.505          | -5.219             | -3.778 | 1.441          |
| Su6 | -5.284             | -3.66  | 1.624          | -5.238             | -3.716 | 1.522          | -5.172             | -3.78  | 1.392          |

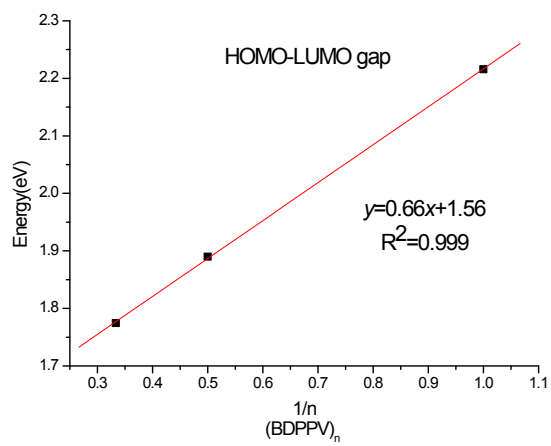

Fig. S1. HOMO-LUMO gaps ( $\Delta H-L$ ) as a function of reciprocal chain length  $n$  in oligomers of BDPPV.

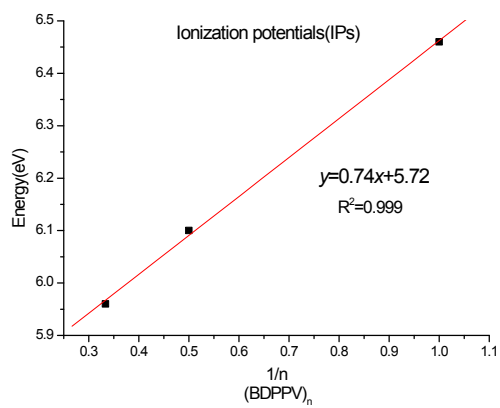

(a)

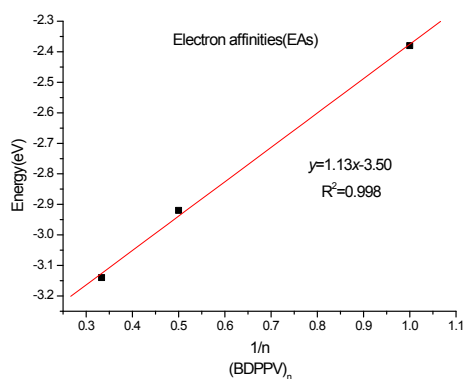

(b)

Fig S2. The IP (a) and EA (b) as a function of reciprocal chain length  $n$  in oligomers of BDPPV.
